# Supplementary material for: Chemical metabolomics for investigating the protective effectiveness of Acanthopanax senticosus Harms leaf against acute promyelocytic leukemia
Source: PubMed Central journal article supplement (PMC9079283; doi:10.1039/c8ra01029c), 2018-03-28
Supplement: RA-008-C8RA01029C-s001.pdf [file RA-008-C8RA01029C-s001.pdf]

Supplementary Table 1 The results of WBC, NEUT%, and LYMPH% of mice in different group (x±s) (n=6)

| Group                    | Normal group  | Model group               | Dose group(A)            | Dose group(B) |
|--------------------------|---------------|---------------------------|--------------------------|---------------|
| WBC(*10 <sup>9</sup> /L) | 1.17 ± 0.38   | 3.11 ± 0.63 <sup>**</sup> | 1.80 ± 0.43 <sup>△</sup> | 2.78 ± 1.48   |
| NEUT (%)                 | 59.79 ± 16.63 | 61.71 ± 0.82              | 59.48 ± 20.14            | 64.51 ± 18.41 |
| LYMPH (%)                | 25.67 ± 12.82 | 25.24 ± 0.98              | 27.25 ± 11.78            | 25.35 ± 17.25 |

Model group compared with normal group, <sup>\*\*</sup>p<0.01; Dose group compared with model group, <sup>△△</sup>p<0.01, <sup>△</sup>p<0.05.

Supplementary Table 2 The results of the expression of CD33 in spleen of mice (x ± s) (n=6)

| Group | Normal group    | Model group                   | Dose group(A)                 | Dose group(B)                |
|-------|-----------------|-------------------------------|-------------------------------|------------------------------|
| CD33  | 0.0042 ± 0.0008 | 0.0118 ± 0.0050 <sup>**</sup> | 0.0028 ± 0.0014 <sup>△△</sup> | 0.0052 ± 0.0034 <sup>△</sup> |

Model group compared with normal group, <sup>\*\*</sup>p<0.01; Dose group compared with model group, <sup>△△</sup>p<0.01, <sup>△</sup>p<0.05.

Supplementary Table 3 Proposed metabolites identified in plasma metabolome.

| No. | Rt(min) | Measured m/z | ESI+/- | Error (ppm) | Formula                                                        | Identify                    | Vip | Changes in model against healthy controls |
|-----|---------|--------------|--------|-------------|----------------------------------------------------------------|-----------------------------|-----|-------------------------------------------|
| 1   | 0.51    | 153.028      | -      | -3.9        | C <sub>4</sub> H <sub>6</sub> N <sub>2</sub> O <sub>3</sub> Na | D-Asparagine                | 1.5 | ↓                                         |
| 2   | 0.52    | 243.061      | -      | 5.8         | C <sub>9</sub> H <sub>11</sub> N <sub>2</sub> O <sub>6</sub>   | Uridine                     | 1.5 | ↑                                         |
| 3   | 0.52    | 160.133      | +      | -7.5        | C <sub>8</sub> H <sub>18</sub> NO <sub>2</sub>                 | Pregabalin                  | 2.4 | ↓                                         |
| 4   | 0.62    | 105.009      | +      | -2.1        | C <sub>3</sub> H <sub>5</sub> O <sub>4</sub>                   | Malonic acid                | 1.8 | ↓                                         |
| 5   | 0.74    | 141.041      | +      | 0.7         | C <sub>7</sub> H <sub>6</sub> N <sub>2</sub> Na                | 2-(Methylthio)phenol        | 1.8 | ↑                                         |
| 6   | 0.75    | 107.048      | +      | 4.7         | C <sub>5</sub> H <sub>8</sub> ONa                              | 1-Penten-5-one              | 1.1 | ↑                                         |
| 7   | 0.76    | 137.035      | +      | -3.4        | C <sub>5</sub> H <sub>5</sub> N <sub>4</sub> O                 | Hypoxanthine                | 8.7 | ↓                                         |
| 8   | 0.8     | 135.04       | -      | 3.7         | C <sub>4</sub> H <sub>8</sub> O <sub>5</sub>                   | Threonate                   | 3.8 | ↓                                         |
| 9   | 0.82    | 190.965      | +      | 0           | C <sub>7</sub> H <sub>5</sub> O <sub>2</sub> Cl <sub>2</sub>   | 2,4-Dichlorobenzoate        | 1.1 | ↓                                         |
| 10  | 0.82    | 269.089      | +      | -6.3        | C <sub>9</sub> H <sub>17</sub> O <sub>9</sub>                  | 2(α-D-Mannosyl)-D-glycerate | 1.7 | ↓                                         |

|    |      |          |   |      |                                                                |                                     |     |   |
|----|------|----------|---|------|----------------------------------------------------------------|-------------------------------------|-----|---|
| 11 | 0.87 | 174.97   | + | 5.1  | C <sub>4</sub> H <sub>8</sub> S <sub>3</sub> Na                | 5-Sulfinylpyruvic acid              | 1.4 | ↓ |
| 12 | 0.92 | 191.0234 | - | 2.7  | C <sub>6</sub> H <sub>7</sub> O <sub>7</sub>                   | Citric acid                         | 1.0 | ↑ |
| 13 | 1.11 | 207.089  | + | 6.3  | C <sub>7</sub> H <sub>15</sub> N <sub>2</sub> O <sub>3</sub> S | Diethyl tartrate                    | 1.3 | ↓ |
| 14 | 1.5  | 119.027  | + | 0.5  | C <sub>4</sub> H <sub>7</sub> O <sub>4</sub>                   | Succinic acid                       | 1.5 | ↓ |
| 15 | 1.7  | 160.038  | - | 4.4  | C <sub>9</sub> H <sub>6</sub> NO <sub>2</sub>                  | 4,6-Dihydroxyquinoline              | 1.1 | ↑ |
| 16 | 2.0  | 105.034  | + | -8.6 | C <sub>4</sub> H <sub>9</sub> OS                               | 2,4-Pentadienal                     | 2.1 | ↑ |
| 17 | 2.2  | 91.0336  | + | 2.3  | C <sub>3</sub> H <sub>7</sub> O <sub>3</sub>                   | Lactic acid                         | 1.2 | ↑ |
| 18 | 3.53 | 89.0445  | + | -0.5 | C <sub>3</sub> H <sub>8</sub> NO <sub>2</sub>                  | Alanine                             | 1.9 | ↓ |
| 19 | 3.85 | 204.05   | + | 2    | C <sub>6</sub> H <sub>7</sub> N <sub>5</sub> O <sub>2</sub> Na | 8-Hydroxy-7-methylguanine           | 1.3 | ↓ |
| 20 | 4.87 | 146.0659 | + | -1.4 | C <sub>5</sub> H <sub>11</sub> N <sub>2</sub> O <sub>3</sub>   | L-Glutamine                         | 2.4 | ↓ |
| 21 | 5.67 | 117.1790 | + | 2    | C <sub>5</sub> H <sub>12</sub> NO <sub>2</sub>                 | valine                              | 1.2 | ↓ |
| 22 | 6.06 | 319.225  | + | -6.9 | C <sub>18</sub> H <sub>32</sub> O <sub>3</sub> Na              | Dimorphecolic acid                  | 1.1 | ↓ |
| 23 | 6.14 | 335.224  | - | 8.9  | C <sub>20</sub> H <sub>31</sub> O <sub>4</sub>                 | Leukotriene B4                      | 2.9 | ↓ |
| 24 | 6.4  | 155.0569 | + | -7.2 | C <sub>6</sub> H <sub>10</sub> N <sub>3</sub> O <sub>2</sub>   | histidine                           | 1.5 | ↓ |
| 25 | 6.58 | 267.082  | - | 4.5  | C <sub>10</sub> H <sub>11</sub> N <sub>4</sub> O <sub>5</sub>  | Inosine                             | 1.1 | ↓ |
| 26 | 7.02 | 175.024  | - | -5.2 | C <sub>5</sub> H <sub>7</sub> N <sub>2</sub> O <sub>5</sub>    | N-Carbamoyl-L-aspartic acid         | 1.1 | ↓ |
| 27 | 7.4  | 131.0986 | + | 3.6  | C <sub>6</sub> H <sub>14</sub> NO <sub>2</sub>                 | Isoleucine                          | 1.3 | ↓ |
| 28 | 7.57 | 255.212  | + | -5.9 | C <sub>19</sub> H <sub>27</sub>                                | 18-Nor-4(19),8,11,15-abietatetraene | 1.7 | ↓ |
| 29 | 7.59 | 317.211  | - | -7.9 | C <sub>18</sub> H <sub>30</sub> O <sub>3</sub> Na              | 5-Oxo-ETE                           | 2.8 | ↑ |
| 30 | 7.67 | 333.204  | - | -1.5 | C <sub>18</sub> H <sub>30</sub> O <sub>4</sub> Na              | 13(S)-HpODE                         | 8.9 | ↓ |
| 31 | 7.9  | 315.195  | - | -5.1 | C <sub>20</sub> H <sub>27</sub> O <sub>3</sub>                 | 15-deoxy-δ-12,14-PGJ2               | 2.1 | ↓ |
| 32 | 8.1  | 337.238  | + | 4.4  | C <sub>20</sub> H <sub>33</sub> O <sub>4</sub>                 | 6-trans-12-epi-LTB4                 | 3.4 | ↑ |
| 33 | 8.3  | 245.176  | + | -1.3 | C <sub>12</sub> H <sub>25</sub> N <sub>2</sub> O <sub>3</sub>  | Leucyl-Isoleucine                   | 1.2 | ↓ |
| 34 | 8.45 | 291.132  | + | 4.5  | C <sub>10</sub> H <sub>19</sub> N <sub>4</sub> O <sub>6</sub>  | Argininosuccinic acid               | 4.7 | ↓ |
| 35 | 8.6  | 145.101  | + | 4.8  | C <sub>9</sub> H <sub>14</sub> Na                              | Santene                             | 1.6 | ↓ |
| 36 | 8.62 | 207.139  | + | -3.9 | C <sub>13</sub> H <sub>19</sub> O <sub>2</sub>                 | Benzyl hexanoate                    | 1.2 | ↓ |

|    |       |         |   |      |                                                               |                                  |     |   |
|----|-------|---------|---|------|---------------------------------------------------------------|----------------------------------|-----|---|
| 37 | 8.7   | 209.151 | + | 6.7  | C <sub>13</sub> H <sub>21</sub> O <sub>2</sub>                | Undecanoic acid                  | 1.6 | ↓ |
| 38 | 8.8   | 123.049 | + | 3    | C <sub>6</sub> H <sub>7</sub> N <sub>2</sub> O                | Isonicotineamide                 | 1.3 | ↓ |
| 39 | 8.93  | 161.132 | + | 9.3  | C <sub>7</sub> H <sub>17</sub> N <sub>2</sub> O <sub>2</sub>  | N(6)-Methyllysine                | 1.7 | ↓ |
| 40 | 9.19  | 333.206 | - | 4.5  | C <sub>18</sub> H <sub>30</sub> O <sub>4</sub> Na             | 7S,8S-DiHODE                     | 4.0 | ↓ |
| 41 | 10.01 | 385.398 | - | 7.5  | C <sub>27</sub> H <sub>45</sub> O                             | Cholesterol                      | 2.6 | ↓ |
| 42 | 10.09 | 378.238 | - | -0.5 | C <sub>20</sub> H <sub>32</sub> N <sub>3</sub> O <sub>4</sub> | Sphingosine-1-phosphate          | 5.3 | ↑ |
| 43 | 10.12 | 273.225 | + | 7.3  | C <sub>14</sub> H <sub>29</sub> N <sub>2</sub> O <sub>3</sub> | N(6)-(Octanoyl)lysine            | 1.3 | ↓ |
| 44 | 10.51 | 380.255 | - | -9.3 | C <sub>18</sub> H <sub>39</sub> NO <sub>5</sub> P             | Sphinganine-phosphate            | 3.0 | ↑ |
| 45 | 11.33 | 303.242 | - | 3.4  | C <sub>20</sub> H <sub>31</sub> O <sub>2</sub>                | Arachidonic Acid (peroxide free) | 2.0 | ↑ |
| 46 | 12.78 | 436.288 | - | -2.3 | C <sub>21</sub> H <sub>43</sub> NO <sub>6</sub> P             | PE(P-16:0/0:0)                   | 2.2 | ↑ |
| 47 | 18.72 | 136.052 | + | -7.1 | C <sub>5</sub> H <sub>6</sub> N <sub>5</sub>                  | Adenine                          | 2.8 | ↑ |
| 48 | 19.02 | 136.021 | + | -0.7 | C <sub>7</sub> H <sub>6</sub> NS                              | Benzothiazole                    | 3.6 | ↑ |

Note: “↑” represents a trend of higher; “↓” represents a trend of lower

Supplementary Table 4 Result from ingenuity pathway analysis with Metabolyst based on KEGG

| Pathway name                                  | p         | -log(p) | Holm p   | FDR      | Impact  |
|-----------------------------------------------|-----------|---------|----------|----------|---------|
| 1 Alanine, aspartate and glutamate metabolism | 1.8081E-4 | 8.6181  | 0.014465 | 0.018681 | 0.20703 |
| 2 Citrate cycle (TCA cycle)                   | 0.0041197 | 5.492   | 0.3131   | 0.077512 | 0.07773 |
| 3 Purine metabolism                           | 7.8213E-4 | 7.1535  | 0.060224 | 0.021938 | 0.01793 |
| 4 Aminoacyl-tRNA biosynthesis                 | 3.563E-4  | 7.9397  | 0.028148 | 0.019454 | 0.0     |
| 5 Propanoate metabolism                       | 5.6681E-4 | 7.4755  | 0.056902 | 0.019454 | 0.00134 |
| 6 Valine, leucine and isoleucine biosynthesis | 0.0074642 | 4.8976  | 0.65704  | 0.11681  | 0.0265  |
| 7 Pyruvate metabolism                         | 0.034351  | 3.3711  | 1.0      | 0.85366  | 0.13756 |
| 8 Histidine metabolism                        | 0.19901   | 1.6144  | 1.0      | 0.9691   | 0.13988 |
| 9 D-Glutamine and D-glutamate metabolism      | 0.053602  | 2.9262  | 1.0      | 0.42144  | 0.02674 |
| 10 Pyrimidine metabolism                      | 0.034351  | 3.3711  | 1.0      | 0.31965  | 0.01492 |

|                                               |          |        |     |         |         |
|-----------------------------------------------|----------|--------|-----|---------|---------|
| 11 Glycolysis or Gluconeogenesis              | 0.024442 | 1.9354 | 1.0 | 0.85366 | 0.0     |
| 12 Valine, leucine and isoleucine degradation | 0.016    | 4.1352 | 1.0 | 0.18712 | 0.0     |
| 13 Butanoate metabolism                       | 0.18254  | 1.7008 | 1.0 | 0.9691  | 0.01774 |
| 14 Arachidonic acid metabolism                | 0.26939  | 1.3116 | 1.0 | 1.0     | 0.00881 |

Note: the p is the original p value calculated from the enrichment analysis; the Holm p is the p value adjusted by Holm–Bonferroni method; the FDR p is the p value adjusted using False Discovery Rate; the Impact is the pathway impact value calculated from pathway topology analysis.
